# Supplementary material for: Polyphyllin II Induces Protective Autophagy and Apoptosis via Inhibiting PI3K/AKT/mTOR and STAT3 Signaling in Colorectal Cancer Cells
Source: MDPI journal article supplement (doi:10.3390/ijms231911890), 2022-10-06
Supplement: s1 [file s1]

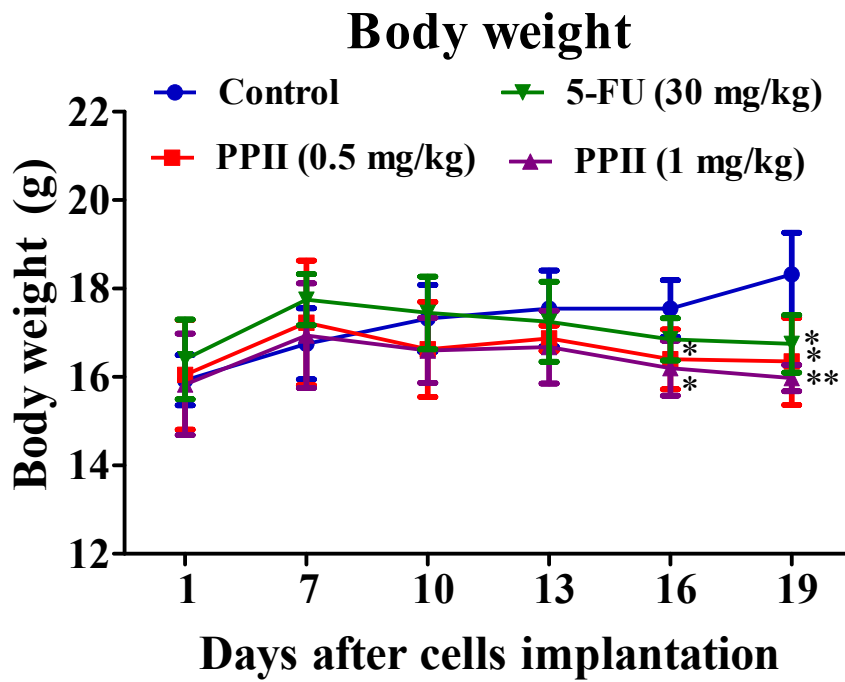

**Figure S1 Body weights of mice.** Mice were i.p. administered with vehicle, PPII (0.5 mg/kg, once every 3 days), PPII (1 mg/kg, once every 3 days) or 5-FU (30 mg/kg, positive control, once every two days) daily for 12 consecutive days. Data are presented as mean  $\pm$  SD. \* $P$ <0.05, \*\* $P$ <0.01.
